# Supplementary material
Source: PubMed Central journal article supplement (PMC1475663)

## A Intronless DNA template under Pol II

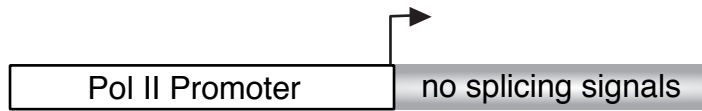

## Pre-synthesized Intronless

no splicing signals

## B

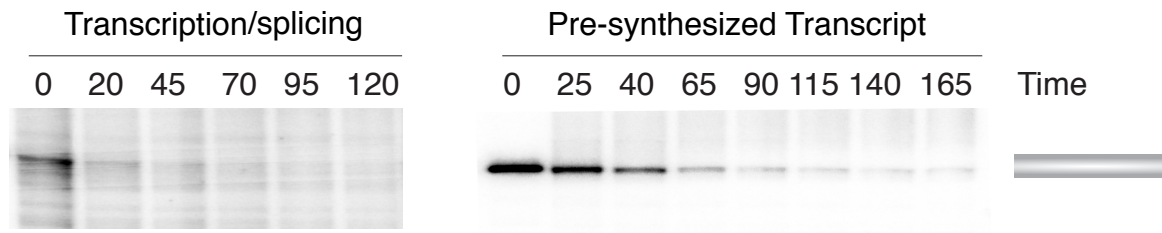

## C

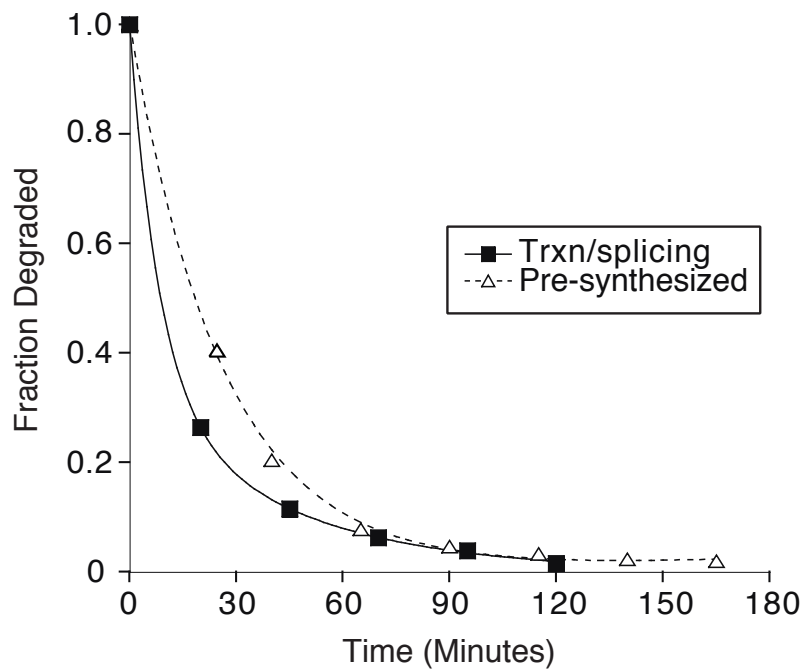

Supplement: pbio.0040147.sg001.pdf [file pbio.0040147.sg001.pdf]

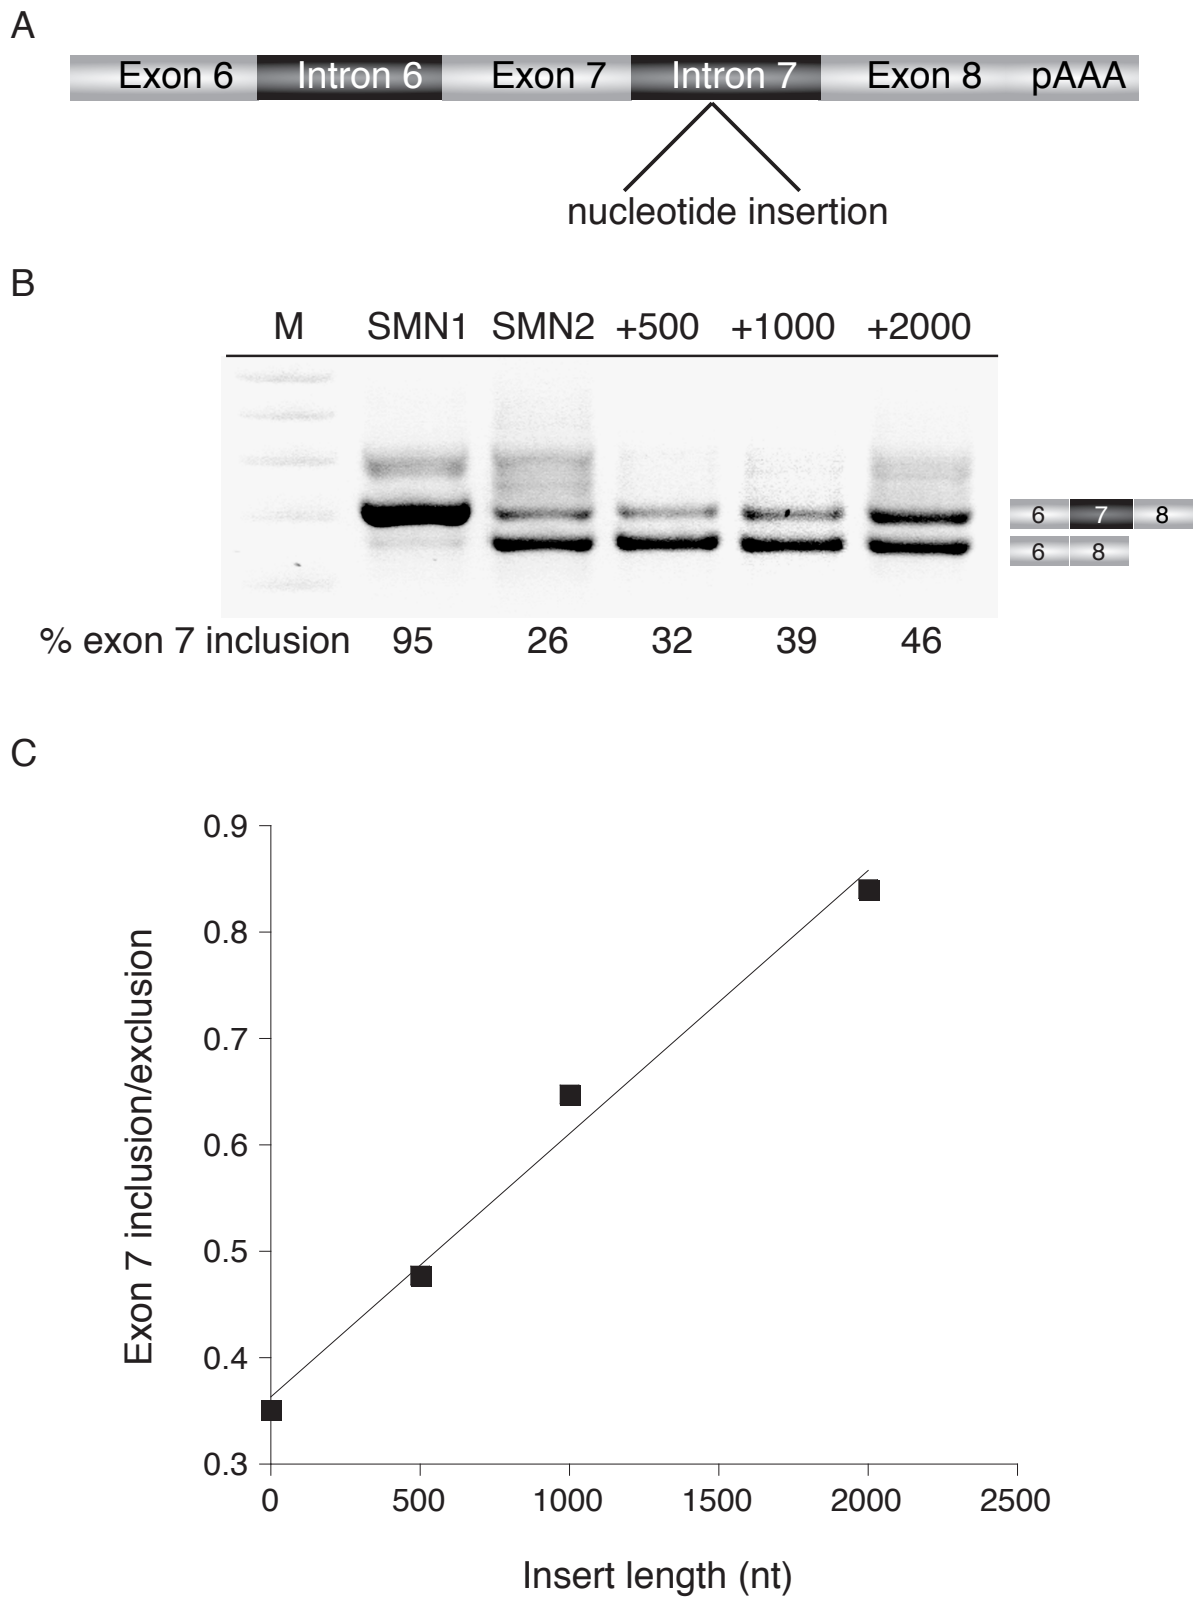

Supplement: pbio.0040147.sg002.pdf [file pbio.0040147.sg002.pdf]

Supporting Figure 3

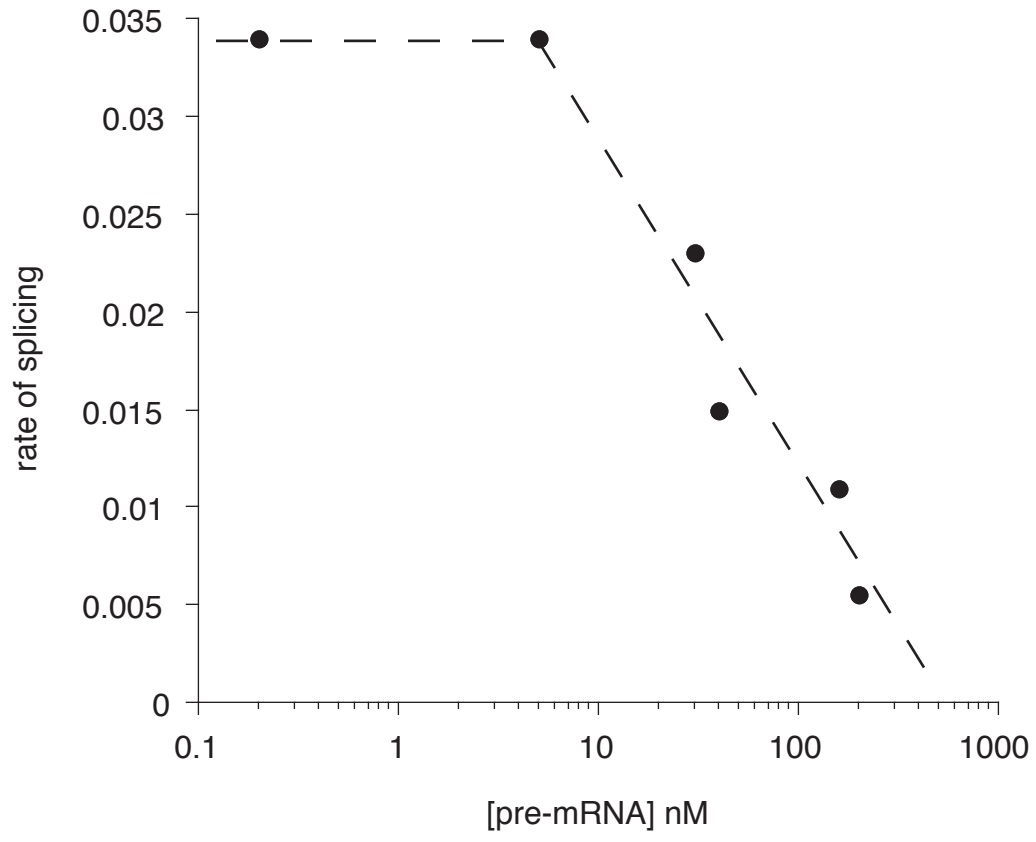

Supplement: pbio.0040147.sg003.pdf [file pbio.0040147.sg003.pdf]
